# Supplementary material
Source: PubMed Central journal article supplement (PMC6384159)
Supplement: NIHMS979969-supplement-OTHER_MATERIALS.pdf [file NIHMS979969-supplement-OTHER_MATERIALS.pdf]

# Supplementary Material

## Characterizing the Natural History of Acute Radiation Syndrome of the Gastrointestinal Tract: Combining high mass and spatial resolution using MALDI-FTICR-MSI

Claire L. Carter\*, Kim Hankey†, Cath Booth‡, Greg Tudor‡, George Parker§, Jace W. Jones\*, Ann M. Farese†, Thomas J. MacVittie†, and Maureen A. Kane\*

\*University of Maryland, School of Pharmacy, Department of Pharmaceutical Sciences

†University of Maryland, School of Medicine, Department of Radiation Oncology,

‡Epistem Ltd, Manchester, UK

§Charles River Laboratories, Pathology Associates, Raleigh-Durham, North Carolina

**Figure 1.** Probabilistic latent semantic analysis (pLSA) score images showing 7 components from the control (A) and irradiated samples taken from each day post-IR, B-F for days 4-21 respectively.

**Figure 2.** MALDI-MS images of PE's and PI's localized to the crypt-villi axis in control and at days 4, 8, 11, 15 and 21 post-exposure.

**Figure 3.** MALDI-MS images of glycosphingolipids mapped to the villi epithelium in control and days 4, 8, 11, 15 and 21 post-irradiation.

**Figure 4.** MALDI-MS images of PL's localized to the lamina Propria and muscularis externa in the control and at days 4, 8, 11, 15, and 21 post-exposure.

**Figure 5.** MALDI-MS images of cardiolipins detected in the jejunum of control and irradiated animals taken at days 4, 8, 11, 15 and 21 post-exposure.

**Figure 6.** MALDI-MS images of GSLs detected in the jejunum of control and irradiated animals taken at days 4, 8, 11, 15 and 21 post-exposure.

**Table 1.** Ki67 IHC staining protocol.

**Table 2.** CD 13 IHC staining protocol.

A) Control

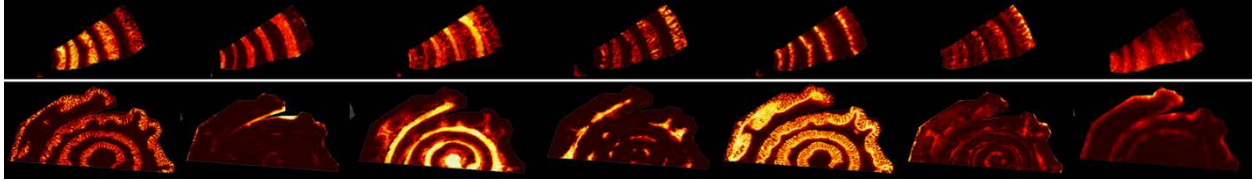

B) Day 4

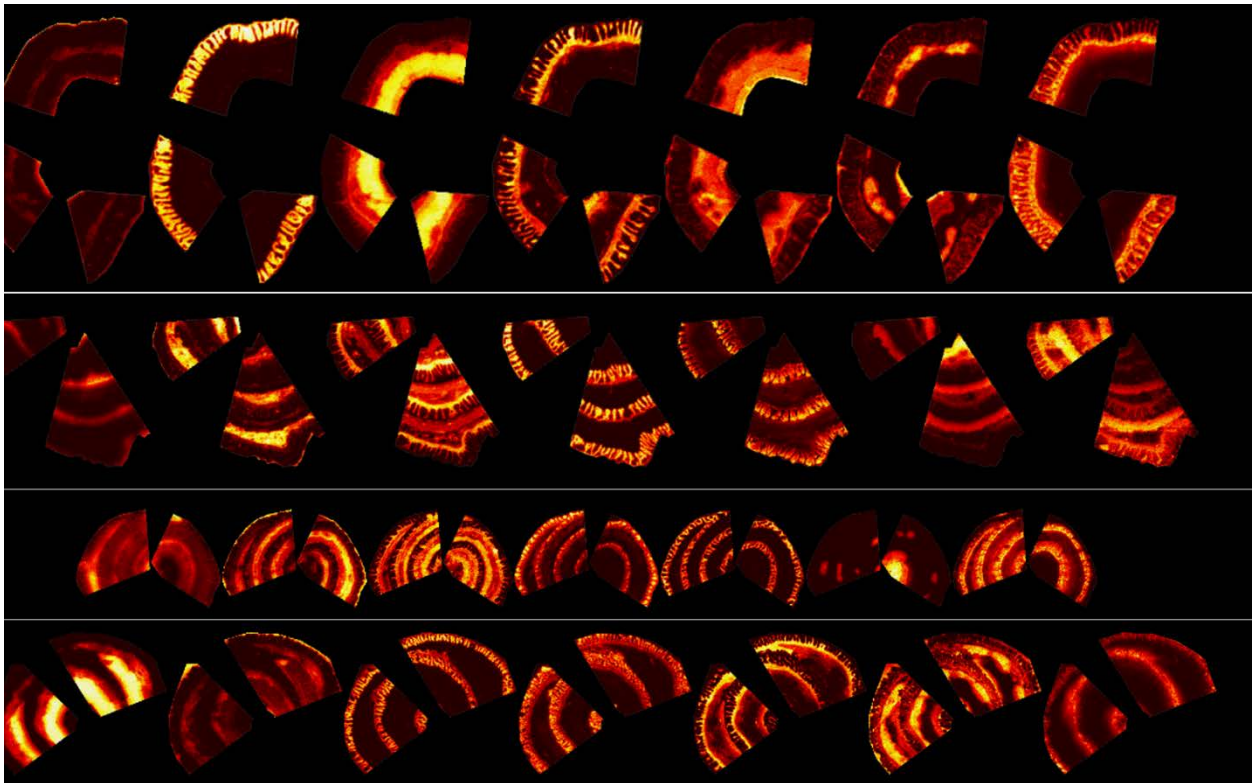

C) Day 8

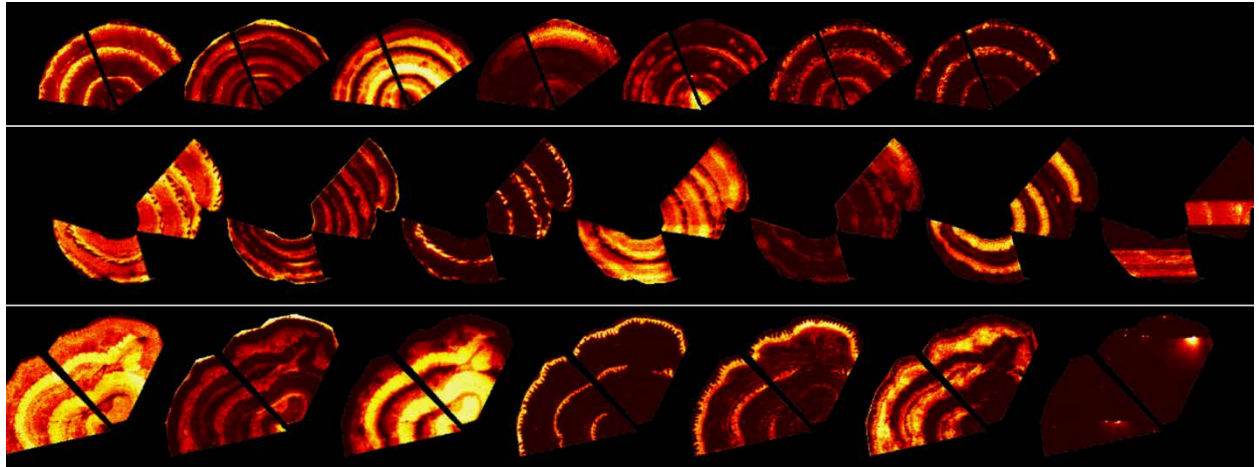

D) Day 11

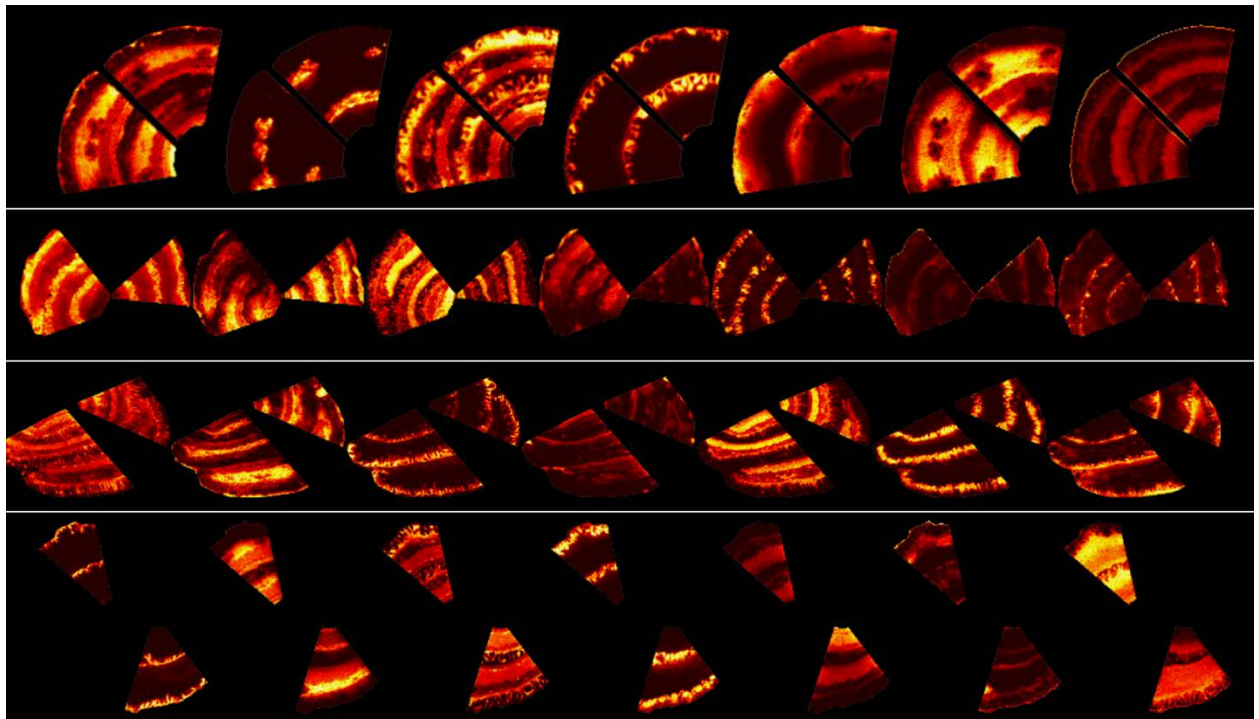

E) Day 15

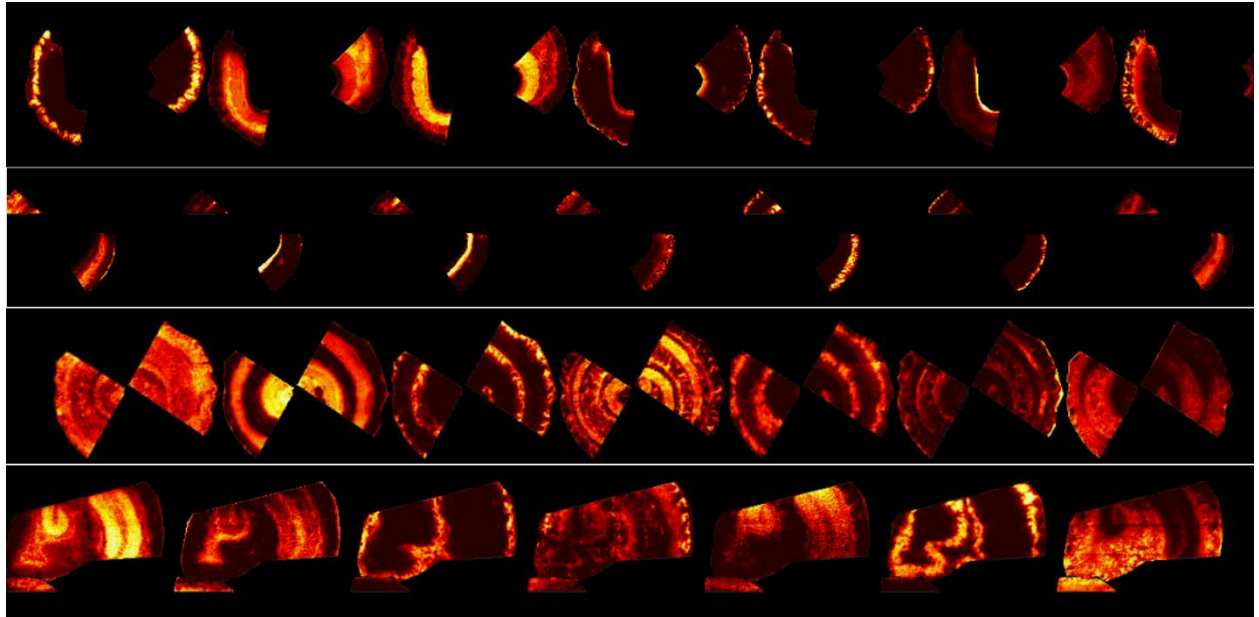

F) Day 21

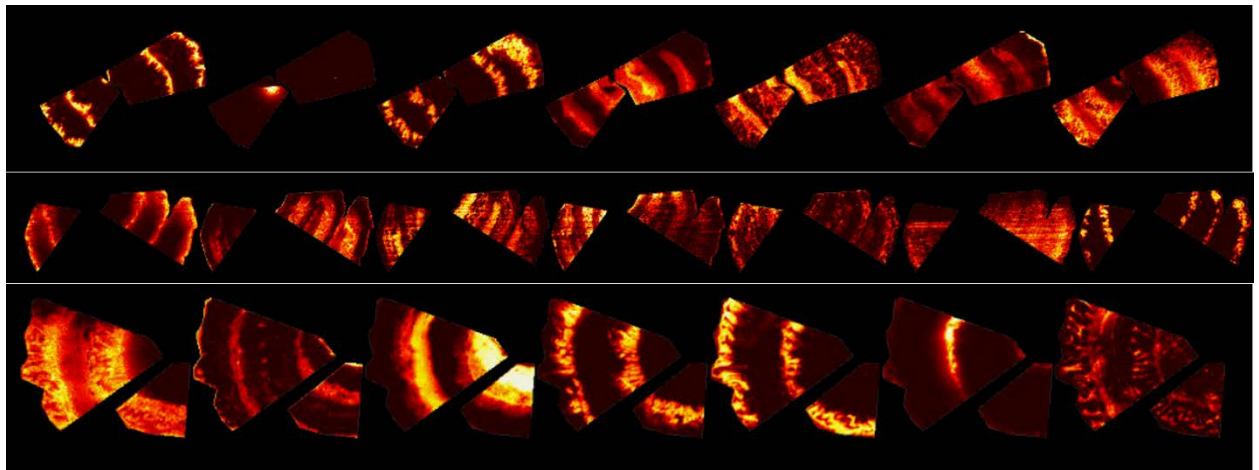

Figure S1.

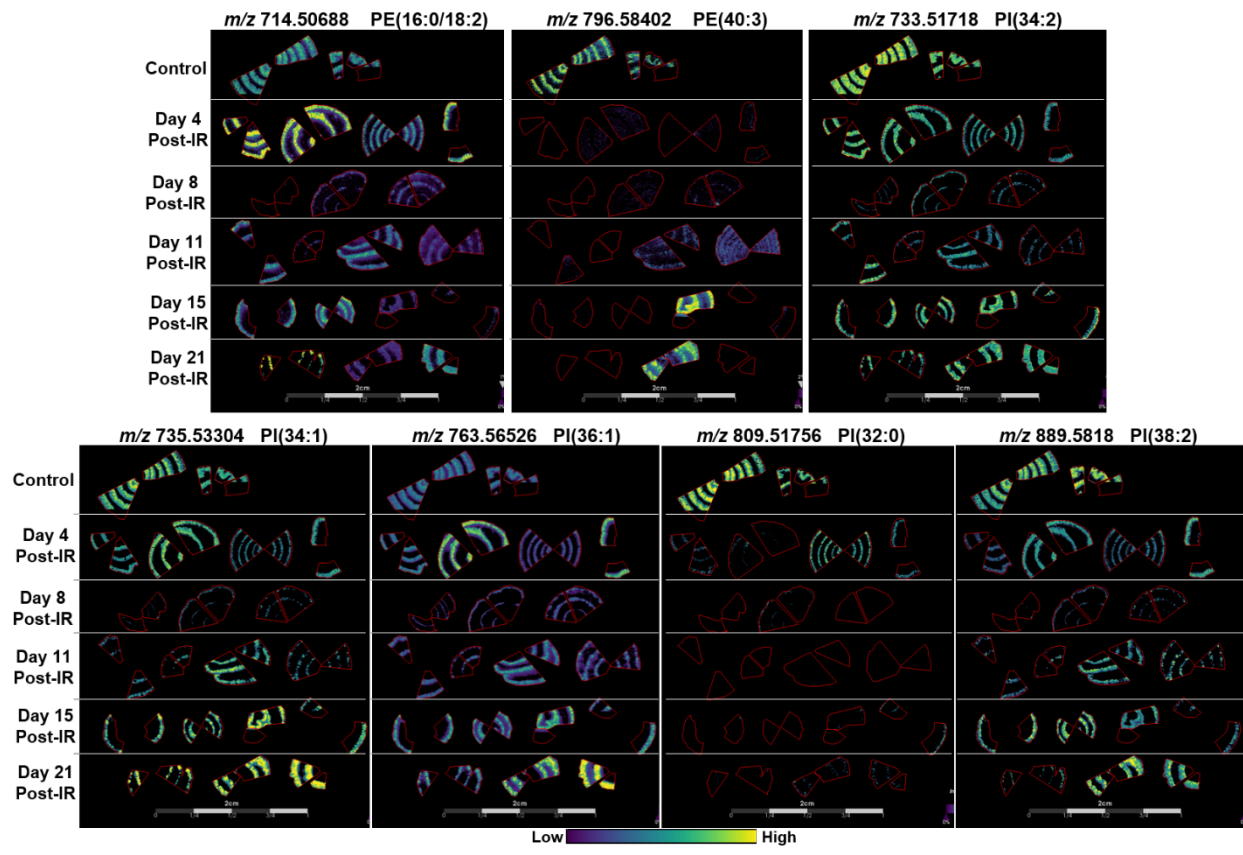

Figure S2.

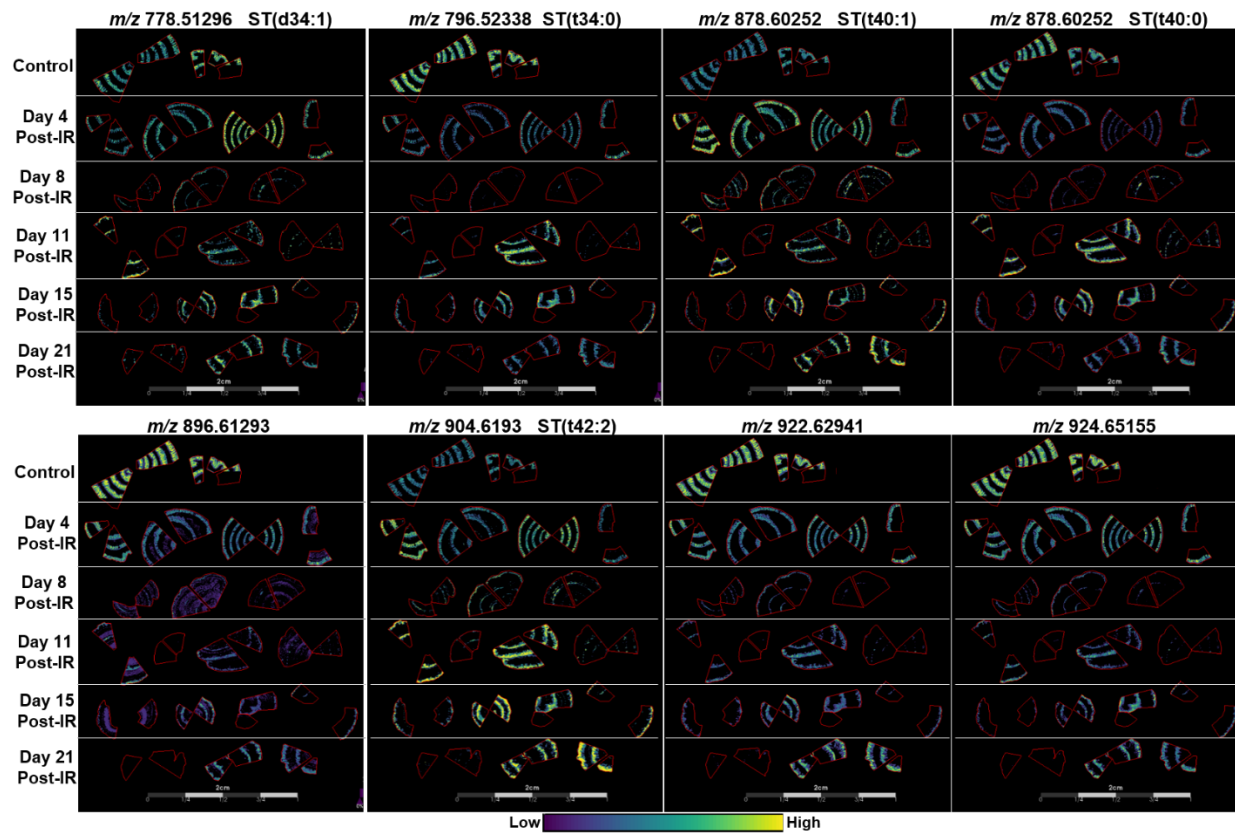

Figure S3.

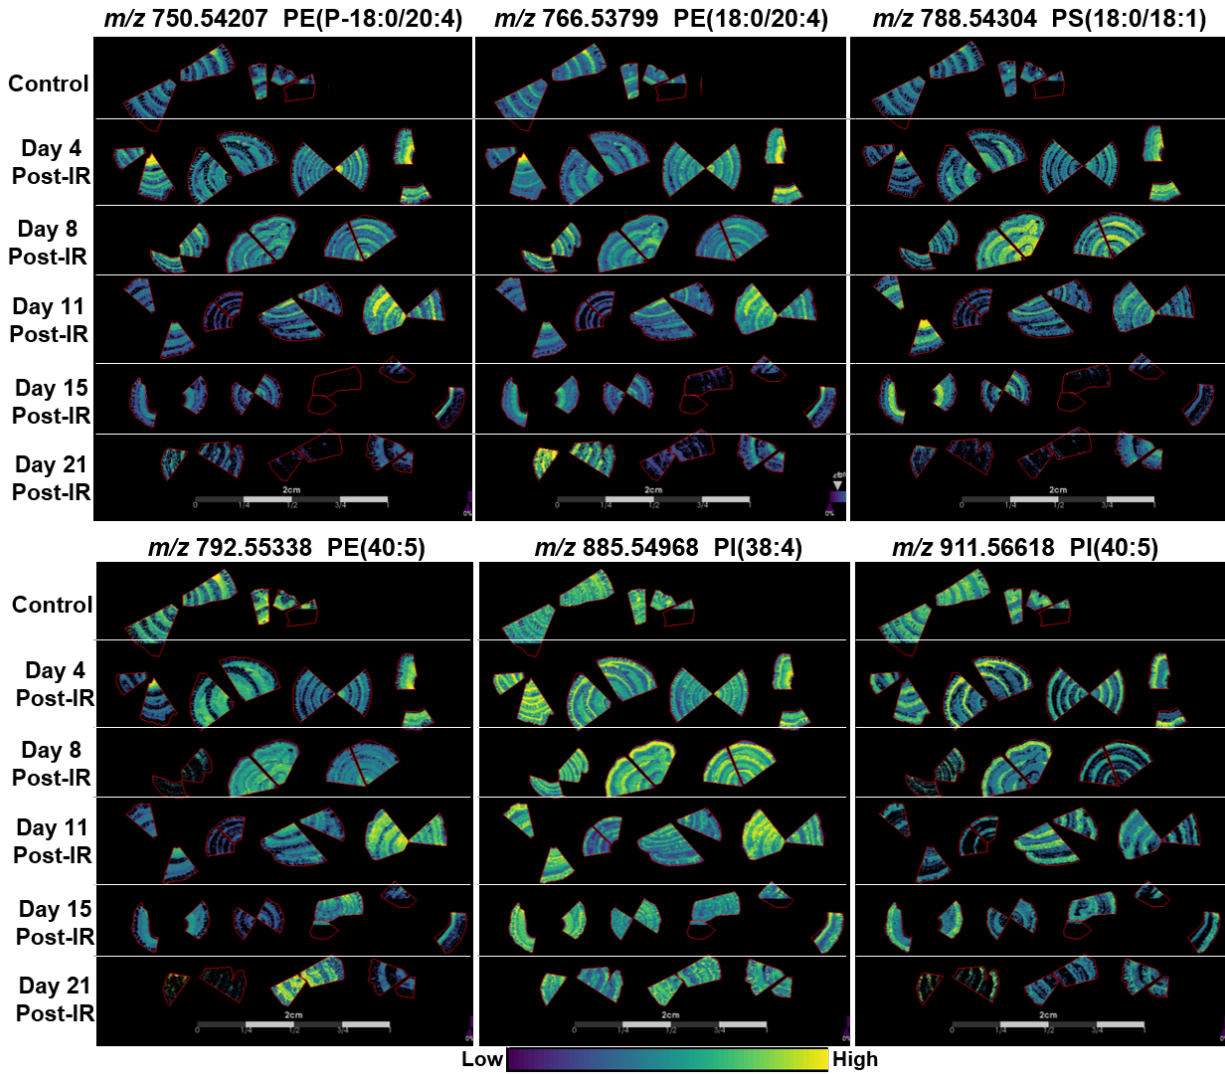

Figure S4.

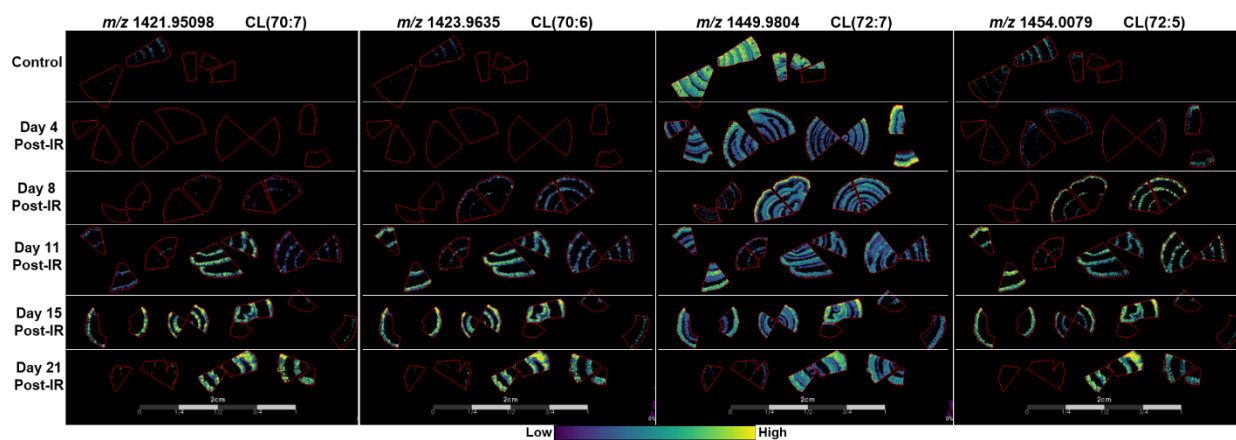

Figure S5

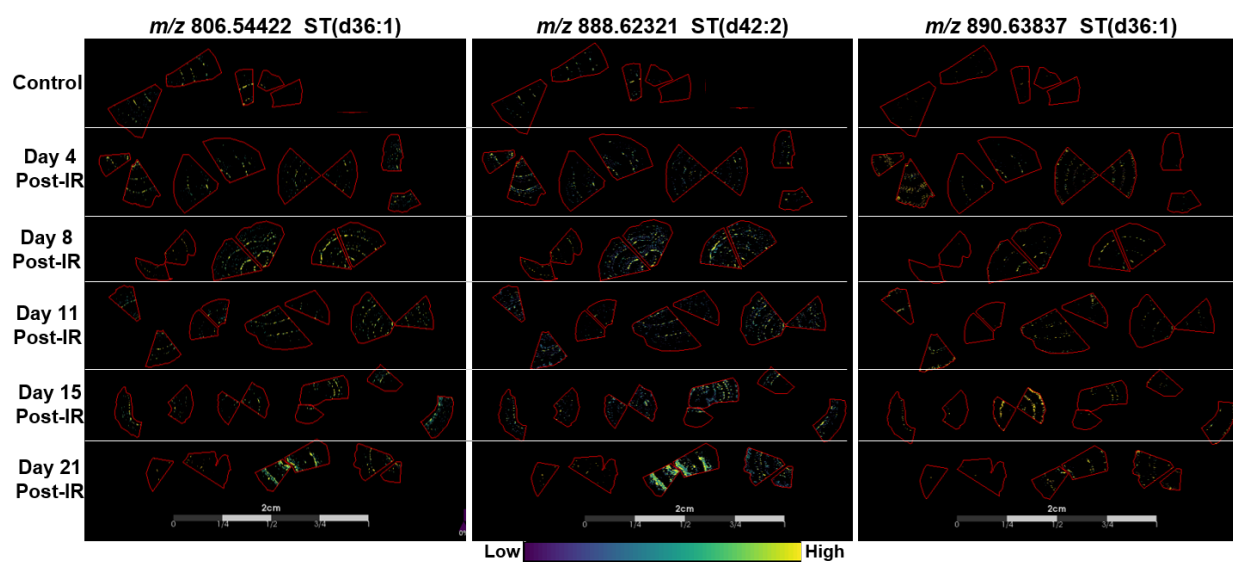

Figure S6.



| <b>Ki-67 (ab15580)(Rb) Immunohistochemistry Staining Procedure</b> |                                                                                                   |
|--------------------------------------------------------------------|---------------------------------------------------------------------------------------------------|
| Step                                                               | Procedure on Ventana Discovery Ultra #11                                                          |
| 1                                                                  | Warm Slides to 69°C for 3 cycles of 8mins on Ultra.                                               |
| 2                                                                  | Deparaffinize with EZ prep (Ventana, Reference No. 950-100).                                      |
| 3                                                                  | Apply Liquid Coverslip (Ventana, reference No. 650-010).                                          |
| 4                                                                  | Antigen retrieval with RiboCC incubation at 95°C for 32 minutes (Ventana, reference No. 760-107). |
| 5                                                                  | Rinse slide with Reaction Buffer (Ventana, reference No. 950-300).                                |
| 6                                                                  | Apply Liquid Coverslip.                                                                           |
| 7                                                                  | Apply Background Sniper block option for 8 Minutes (Biocare medical, reference No. BS966M)        |
| 8                                                                  | Rinse slide with Reaction Buffer.                                                                 |
| 9                                                                  | Apply Inhibitor CM and incubate for 4 minutes (Ventana, reference No. 760-159)                    |
| 10                                                                 | Rinse slide with Reaction Buffer.                                                                 |
| 11                                                                 | Apply primary antibody anti-Ki-67 for 32 minutes (abcam, reference No. Ab15580) Dilution: 1:500.  |
| 12                                                                 | Rinse slide with Reaction Buffer.                                                                 |
| 13                                                                 | Apply OmniMap anti-rabbit and incubate for 12 minutes (Ventana, reference No. 760-4311).          |
| 14                                                                 | Rinse slide with Reaction Buffer.                                                                 |
| 15                                                                 | Apply DAB CM and DAB H2O2 CM and incubate for 8 minutes (Ventana, reference No. 760-159).         |
| 16                                                                 | Rinse slide with Reaction Buffer.                                                                 |
| 17                                                                 | Apply Copper CM and incubate for 4 minutes (Ventana, reference No. 760-159).                      |
| 18                                                                 | Rinse slide with Reaction Buffer.                                                                 |
| 19                                                                 | Apply Hematoxylin and incubate for 8 minutes (Ventana, reference No. 760-2021).                   |
| 20                                                                 | Rinse slide with Reaction buffer.                                                                 |
| 21                                                                 | Apply Bluing Reagent and incubate for 4 minutes (Ventana, reference No. 760-2037).                |
| 22                                                                 | Rinse slide with Reaction Buffer.                                                                 |
| 23                                                                 | Remove slides, dehydrate, and coverslip.                                                          |

**Table 1.**

| <b>CD13 (NHP) Immunohistochemistry Staining Procedure</b> |                                                                                                         |
|-----------------------------------------------------------|---------------------------------------------------------------------------------------------------------|
| Step                                                      | Procedure on Ventana Discovery XT, Protocol #116                                                        |
| 1                                                         | Warm slides to 75°C.                                                                                    |
| 2                                                         | Deparaffinize with EZ prep (Ventana, reference no. 950-100).                                            |
| 3                                                         | Apply Liquid Coverslip (Ventana, reference no. 650-010).                                                |
| 4                                                         | Antigen retrieval with Protease 2 (Ventana, reference no. 760-2019) for 4 minutes at 37 degree Celsius. |
| 5                                                         | Rinse slide with Reaction Buffer (Ventana, reference no. 950-300).                                      |
| 6                                                         | Apply Liquid Coverslip.                                                                                 |
| 7                                                         | Apply Inhibitor CM and incubate for 4 minutes (Ventana, reference no. 760-159).                         |
| 8                                                         | Rinse slide with Reaction Buffer.                                                                       |

|    |                                                                                                                    |
|----|--------------------------------------------------------------------------------------------------------------------|
| 9  | Apply primary antibody anti-CD13 <sup>1</sup> for 32 minutes at 37 degree Celsius (abcam, reference no. ab108310). |
| 10 | Rinse slide with Reaction Buffer.                                                                                  |
| 11 | Apply OmniMap anti-rabbit HRP and incubate for 12 minutes (Ventana, reference no. 760-4311).                       |
| 12 | Rinse slide with Reaction Buffer.                                                                                  |
| 13 | Apply DAB CM and DAB H <sub>2</sub> O <sub>2</sub> CM and incubate for 8 minutes (Ventana, reference no. 760-159). |
| 14 | Rinse slide with Reaction Buffer.                                                                                  |
| 15 | Apply Copper CM and incubate for 4 minutes (Ventana, reference no. 760-159).                                       |
| 16 | Rinse slide with Reaction Buffer.                                                                                  |
| 17 | Apply Hematoxylin and incubate for 8 minutes. (Ventana, reference no. 760-2021).                                   |
| 18 | Rinse slide with Reaction Buffer.                                                                                  |
| 19 | Apply Bluing Reagent and incubate for 4 minutes (Ventana, reference no. 760-2037).                                 |
| 20 | Rinse slide with Reaction Buffer.                                                                                  |
| 21 | Remove slides, rinse, dehydrate, and coverslip.                                                                    |

**Table 2.**

---
